# Supplementary material for: Bile Microbiome in Patients with Recurrent Common Bile Duct Stones and correlation with the Duodenal Microbiome
Source: Research Square preprint supplement (doi:10.21203/rs.3.rs-1612920/v1), 2022-05-05
Supplement: Supplementary file 2 [file 9942f0e4f73159e5407cd6c8.doc]

**Supplementary**

**Table 1. Baseline Characteristics of the five recurrent CBD stone patients and the 12 gastric ulcer patients**

| **Variables** | **Recurrent CBD stone patient (n=5)** | **Gastric ulcer patients**  **(n=12)** |
| --- | --- | --- |
| Age (years) § | 78 (56-99) | 69.5 (43-85) |
| Sex, male, n (%) | 40.0% | 58.3% |
| HTN, presence, n (%) | 40.0% | 41.7% |
| DM, presence, n (%) | 80.0% | 33.3% |
| Dyslipidemia, presence, n (%) | 40.0% | 8.3% |
| WBC (/ul) | 7,000.0 (4,730.0-10,060.0) | 5,370.8 (3,240.0-8,840.0) |
| CRP (mg/dL) | 5.0 (0.1-11.0) | 0.6 (0.0-1.9) |
| Total bilirubin (mg/dL) | 2.7 (0.6-10.4) | 0.5 (0.2-1.0) |
| AST (IU/L) | 132.2 (15.0-277.0) | 19.3 (12.0-37.0) |
| ALT (IU/L) | 148.6 (9.0-356.0) | 14.4 (6.0-20.0) |
| ALP (IU/L) | 160.4 (95.0-231.0) | 74.3 (44.0-140.0) |

**Abbreviation**: HTN, hypertension; DM, diabetes mellitus; WBC, white blood cell count; CRP, c-reactive protein; AST, alanine aspartatetransferase; ALT, alanine aminontransferase; ALP, alkaline phosphatase

§, median (range)
